# Supplementary material for: Peeling the Layers of Caddisfly Diversity on a Longitudinal Gradient in Karst Freshwater Habitats Reveals Community Dynamics and Stability
Source: MDPI journal article supplement (doi:10.3390/insects12030234), 2021-03-10
Supplement: s1 [file s1]

(A) Springs

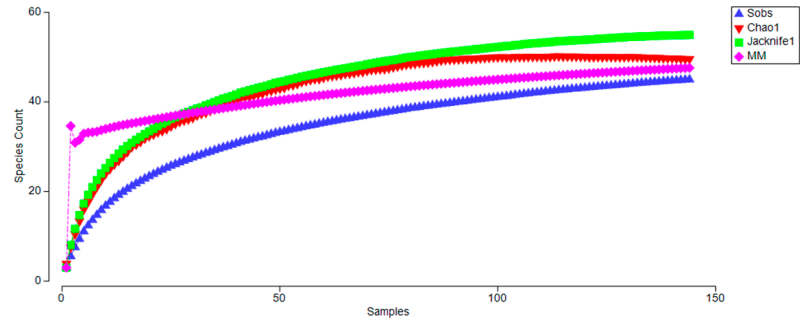

(B) Upper streams

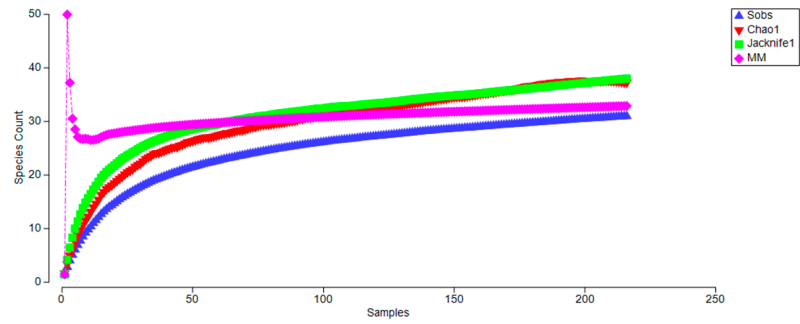

(C) Tufa barriers

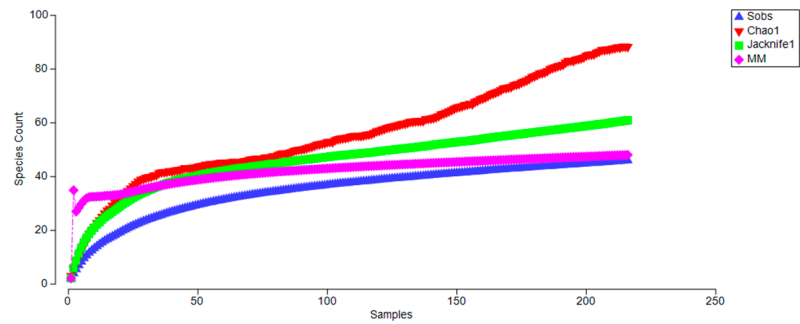

(D) Lower streams

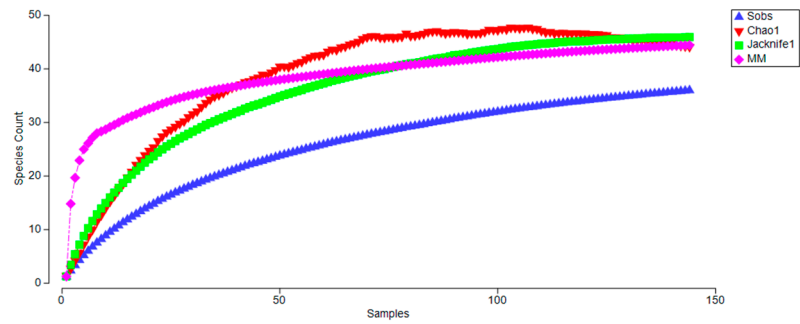

(E) All samples

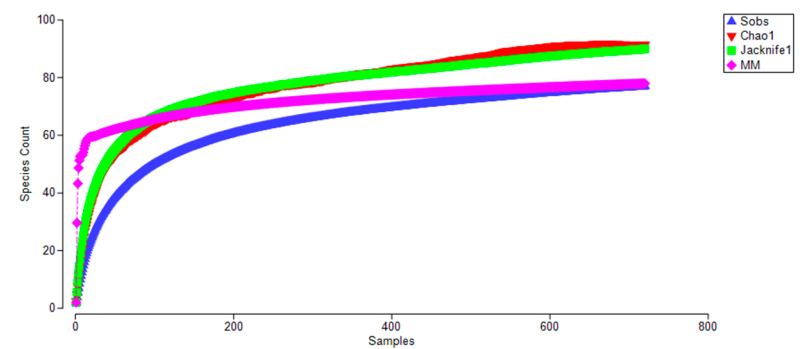

**Figure A1.** Estimates of species richness of caddisflies and sampling efforts in each habitat type in the Plitvice Lakes NP; **(A)** springs, **(B)** upper streams, **(C)** lower streams, **(D)** tufa barriers, and **(E)** total for all habitat types pooled. (Sobs—number of observed species, Chao1—Chao 1, Jackknife1—Jackknife 1 and MM—Michaelis-Menten Mean).
